# Supplementary material for: Cancer Risk in IBD Patients Treated with Thiopurines or Anti-TNF-α Therapy: A Meta- analysis of Population-Based Studies
Source: Research Square preprint supplement (doi:10.21203/rs.3.rs-6904749/v1), 2025-06-25
Supplement: Supplementary file 1 [file eae795b0bbe737d2741a392c.docx]

**Supplementary Table S1.** Quality assessment of included studies

**Supplementary Table** **S3.** Subgroup analysis of the association between IBD and risk of malignancies

**Supplementary Table S4.** Subgroup analysis of the association between IBD and risk of lymphoma

**Supplementary Table S5.** Subgroup analysis of the association between IBD and risk of Colorectal cancer

| **Supplementary Table S1.** Quality assessment of included studies |
| --- |
| **WOS** |
| TS=((("Inflammatory Bowel Diseases"[Mesh]) OR "Inflammatory Bowel Disease" OR "Bowel Diseases, Inflammatory") AND (("Neoplasms"[Mesh]) OR "Neoplasia" OR "Neoplasm" OR "Cancer" OR "Cancers" OR "Malignant Neoplasm" OR "Malignancy" OR "Malignancies" OR "Malignant Neoplasms" OR "Neoplasm, Malignant" OR "Neoplasms, Malignant" OR "Benign Neoplasms" OR "Neoplasms, Benign" OR "Neoplasm, Benign" OR "Benign Neoplasm")) AND (("Tumor Necrosis Factor-alpha"[Mesh]) OR "TNF-alpha" OR "Tumor Necrosis Factor" OR "TNF Superfamily, Member 2" OR "TNFalpha" OR "Cachectin-Tumor Necrosis Factor" OR "Cachectin Tumor Necrosis Factor" OR "Cachectin" OR "Mercaptopurine" OR "6-Mercaptopurine" OR "6 Mercaptopurine" OR "6H-Purine-6-thione, 1,7-dihydro-" OR "6-Thiohypoxanthine" OR "6 Thiohypoxanthine" OR "6-Thiopurine" OR "6 Thiopurine" OR "1,7-Dihydro-6H-purine-6-thione" OR "6-Mercaptopurine Monohydrate" OR "6 Mercaptopurine Monohydrate" OR "Purinethol" OR "Puri-Nethol" OR "Purimethol" OR "Leupurin" OR "BW 57-323H" OR "BW 57323H" OR "BW 57 323H" OR "Mercaptopurina Wellcome" OR "Mecaptopurine Anhydrous") |
| **Pubmed** |
| ((("Inflammatory Bowel Diseases"[Mesh]) OR "Inflammatory Bowel Disease" OR "Bowel Diseases, Inflammatory") AND (("Neoplasms"[Mesh]) OR "Neoplasia" OR "Neoplasm" OR "Cancer" OR "Cancers" OR "Malignant Neoplasm" OR "Malignancy" OR "Malignancies" OR "Malignant Neoplasms" OR "Neoplasm, Malignant" OR "Neoplasms, Malignant" OR "Benign Neoplasms" OR "Neoplasms, Benign" OR "Neoplasm, Benign" OR "Benign Neoplasm")) AND (("Tumor Necrosis Factor-alpha"[Mesh]) OR "TNF-alpha" OR "Tumor Necrosis Factor" OR "TNF Superfamily, Member 2" OR "TNFalpha" OR "Cachectin-Tumor Necrosis Factor" OR "Cachectin Tumor Necrosis Factor" OR "Cachectin" OR "Mercaptopurine" OR "6-Mercaptopurine" OR "6 Mercaptopurine" OR "6H-Purine-6-thione, 1,7-dihydro-" OR "6-Thiohypoxanthine" OR "6 Thiohypoxanthine" OR "6-Thiopurine" OR "6 Thiopurine" OR "1,7-Dihydro-6H-purine-6-thione" OR "6-Mercaptopurine Monohydrate" OR "6 Mercaptopurine Monohydrate" OR "Purinethol" OR "Puri-Nethol" OR "Purimethol" OR "Leupurin" OR "BW 57-323H" OR "BW 57323H" OR "BW 57 323H" OR "Mercaptopurina Wellcome" OR "Mecaptopurine Anhydrous") |
| **Embase** |
| No. Query Results  #14 #4 AND #6 AND #13 3037  #13 #9 OR #12 64071  #12 #10 OR #11 34480  #11 '6-mercaptopurine' OR '6 mercaptopurine' OR '6h-purine-6-thione, 1,7-dihydro-' OR '6-thiohypoxanthine' OR '6 thiohypoxanthine' OR '6-thiopurine' OR '6 thiopurine' OR '1,7-dihydro-6h-purine-6-thione' OR '6-mercaptopurine monohydrate' OR '6 mercaptopurine monohydrate' OR 'purinethol' OR 'puri-nethol' OR 'purimethol' OR 'leupurin' OR 'bw 57-323h' OR 'bw 57323h' OR 'bw 57 323h' OR 'mercaptopurina wellcome' OR 'mecaptopurine anhydrous' 7828  #10 mercaptopurine 34442  #9 #7 OR #8 610647  #8 'cachectin' OR 'cachetin' OR 'human recombinant tumour necrosis factor alpha' OR 'mhr 24' OR 'recombinant tumour necrosis factor alpha' OR 'tissue necrosis factor' OR 'tnf alfa' OR 'tnf alpha' OR 'tumor necrosis factor alfa' OR 'tumor necrosis factor alpha' OR 'tumor necrosis factor-alpha' OR 'tumor necrosis factors' OR 'tumor necrosis serum' OR 'tumour necrosis factor' OR 'tumour necrosis factor alfa' OR 'tumour necrosis factor alpha' OR 'tumour necrosis factor-alpha' OR 'tumour necrosis factors' OR 'tumour necrosis serum' OR 'tumor necrosis factor' 610647  #7 'tumor necrosis factor' 600191  #6 #4 OR #5 5029074  #5 'acral tumor' OR 'acral tumour' OR 'neoplasia' OR 'neoplasms' OR 'neoplastic disease' OR 'neoplastic entity' OR 'neoplastic mass' OR 'tumor' OR 'tumoral entity' OR 'tumoral mass' OR 'tumorous entity' OR 'tumorous mass' OR 'tumors' OR 'tumour' OR 'tumoural entity' OR 'tumoural mass' OR 'tumourous entity' OR 'tumourous mass' OR 'tumours' OR 'neoplasm' 5029074  #4 neoplasms 318267  #3 #1 OR #2 152631  #2 'inflammatory bowel diseases' OR 'inflammatory bowel disease' 152631  #1 'inflammatory bowel disease' 140071 |

| **Supplementary Table S2. Quality assessment of included studies** | | | | | | | | | |
| --- | --- | --- | --- | --- | --- | --- | --- | --- | --- |
| **Study (cohort）** | **Representativeness of exposed**  **cohort** | **Selection of**  **non-exposed cohort** | **Ascertainment**  **of exposure** | **Outcome not present**  **before study** | **comparability** | **Assessment of outcome** | **Follow-up long enough** | **Adequacy of**  **follow up** | **Quality score** |
| Beigel ,2014 | ★ | ★ | ★ | ★ | ★ | ★ | ★ | ★ | 8 |
| Khan, 2013 | ★ | ★ | ★ | ★ | ★ | ★ | ★ | ★ | 8 |
| Abbas, 2014 | ★ | ★ | ★ | ★ | ★ | ★ | ★ | ★ | 8 |
| Wewer, 2024 | ★ | ★ | ★ | ★ | ★ | ★ | ★ | ★ | 8 |
| Lemaitre, 2017 | ★ | ★ | ★ | ★ | ★ | ★ | ★ | ★ | 8 |
| Khan, 2019 | ★ | ★ | ★ | ★ | ★ | ★ | ★ | ★ | 8 |
| Setshedi, 2012 | ★ | ★ | ★ | ★ | ★ | ★ | ★ | ★ | 8 |
| van den Heuvel, 2016 | ★ | ★ | ★ | ★ | ★ | ★ | ★ | ★ | 8 |
| Cheddani., 2016 | ★ | ★ | ★ | ★ | ★ | ★ | ★ | ★ | 8 |
| A. Bourrier, 2016 | ★ | ★ | ★ | ★ | ★ | ★ | ★ | ★ | 8 |
| Zheng, 2020 | ★ | ★ | ★ | ★ | ★ | ★ | ★ | ★ | 8 |
| Jess, 2013 | ★ | ★ | ★ | ★ | ★ | ★ | ★ | ★ | 8 |
| Peyrin-Biroulet, 2011 | ★ | ★ | ★ | ★ | ★ | ★ | ★ | ★ | 8 |
| Clowry, 2016 | ★ | ★ | ★ | ★ | ★ | ★ | ★ | ★ | 8 |
| Beaugerie, 2013 | ★ | ★ | ★ | ★ | ★ | ★ | ★ | ★ | 8 |
| Scott, 2016 | ★ | ★ | ★ | ★ | ★ | ★ | ★ | ★ | 8 |
| Kobayashi, 2019 | ★ | ★ | ★ | ★ | ★ | ★ | ★ | ★ | 8 |
| Singh, 2011 | ★ | ★ | ★ | ★ | ★ | ★ | ★ | ★ | 8 |
| Kobayashi, 2022 | ★ | ★ | ★ | ★ | ★ | ★ | ★ | ★ | 8 |
| Herrinton, 2011 | ★ | ★ | ★ | ★ | ★ | ★ | ★ | ★ | 8 |
| Vos, 2011 | ★ | ★ | ★ | ★ | ★ | ★ | ★ | ★ | 8 |
| Tassone,2023 | ★ | ★ | ★ | ★ | ★ | ★ | ★ | ★ | 8 |
| Park, 2015 | ★ | ★ | ★ | ★ | ★ | ★ | ★ | ★ | 8 |
| Gordillo, 2015 | ★ | ★ | ★ | ★ | ★ | ★ | ★ | ★ | 8 |
| Lakatos, 2013 | ★ | ★ | ★ | ★ | ★ | ★ | ★ | ★ | 8 |
| Yu,2023 | ★ | ★ | ★ | ★ | ★ | ★ | ★ | ★ | 8 |
| **Study (case-control）** | **Case definition** | **Representativeness of the cases** | **Selection of Controls** | **Definition of Controls** | **Comparability** | **Ascertainment of exposure** | **Same method** | **Non-Response rate** | **Quality score** |
| Long, 2012 | ★ | ★ | ★ | ★ | ★ | ★ | ★ | ☆ | 7 |
| Kopylov, 2015 | ★ | ★ | ★ | ★ | ★ | ★ | ★ | ☆ | 7 |
| Long, 2010 | ★ | ★ | ★ | ★ | ★ | ★ | ★ | ☆ | 7 |
| Nieminen, 2013 | ★ | ★ | ★ | ★ | ★ | ★ | ★ | ☆ | 7 |

| **Supplementary Table S3. Subgroup analysis of the association between IBD and risk of malignancies** | | | | | | | |
| --- | --- | --- | --- | --- | --- | --- | --- |
| **Subgroup** | **No. of studies** | **I2** | **P heterogeneity** | **Hazard ratio** | **95% CI** | **Pooled model** | **P overall effect** |
| **Subtype** |  |  |  |  |  |  |  |
| CD | 3 | 0.0 | 0.388 | 1.43 | 1.25-1.65 | Fixed-effects model | 0.000 |
| UC | 3 | 0.0 | 0.821 | 1.08 | 0.96-1.22 | Fixed-effects model | 0.216 |

| **Supplementary Table S4. Subgroup analysis of the association between IBD and risk of lymphoma** | | | | | | | |
| --- | --- | --- | --- | --- | --- | --- | --- |
| **Subgroup** | **No. of studies** | **I2** | **P heterogeneity** | **Hazard ratio** | **95% CI** | **Pooled model** | **P overall effect** |
| **Subtype** |  |  |  |  |  |  |  |
| CD | 3 | 0.0 | 0.312 | 2.00 | 1.18-3.41 | Fixed-effects model | 0.047 |
| UC | 3 | 0.0 | 0.701 | 1.75 | 0.98-3.14 | Fixed-effects model | 0.000 |

| **Supplementary Table S 5. Subgroup analysis of the association between IBD and risk of Colorectal cancer** | | | | | | | |
| --- | --- | --- | --- | --- | --- | --- | --- |
| **Subgroup** | **No. of studies** | **I2** | **P heterogeneity** | **Hazard ratio** | **95% CI** | **Pooled model** | **P overall effect** |
| **Subtype** |  |  |  |  |  |  |  |
| CD | 2 | 0.0 | 0.704 | 2.55 | 1.67-3.88 | Fixed-effects model | 0.000 |
| UC | 2 | 0.0 | 0.011 | 1.19 | 0.45-3.19 | Fixed-effects model | 0.726 |
